# Supplementary material for: Estimating Marine Carbon Uptake in the Northeast Pacific Using a Neural Network Approach
Source: Copernicus journal article supplement (doi:10.5194/egusphere-2023-870), 2023-05-15
Supplement: Supplementary file 1 [file egusphere-2023-870-supplement.pdf]

Supporting Information for

# Estimating Marine Carbon Uptake in the Northeast Pacific Using a Neural Network Approach

Patrick J. Duke<sup>1</sup>, Roberta C. Hamme<sup>1</sup>, Debby Ianson<sup>2,1</sup>, Peter Landschützer<sup>3</sup>, Mohamed M. M. Ahmed<sup>1,4</sup>, Neil C. Swart<sup>5,1</sup>, Paul A. Covert<sup>2</sup>

<sup>1</sup>School of Earth and Ocean Sciences, University of Victoria, Victoria, BC, Canada

<sup>2</sup>Institute of Ocean Sciences, Fisheries and Oceans Canada, Sidney, BC, Canada

<sup>3</sup>Flanders Marine Institute (VLIZ), Ostend, Belgium

<sup>4</sup>Education and Research Group, Esri Canada, Calgary, AB, Canada

10 <sup>5</sup>Canadian Centre for Climate Modelling and Analysis, Environment and Climate Change Canada, Victoria, BC, Canada

*Correspondence to:* P. J. Duke (pjduke@ucalgary.ca)

## Contents of this file

Figure S1

Figure S2

15 Figure S3

Figure S4

Figure S5

Figure S6

Table S1

20 Table S2

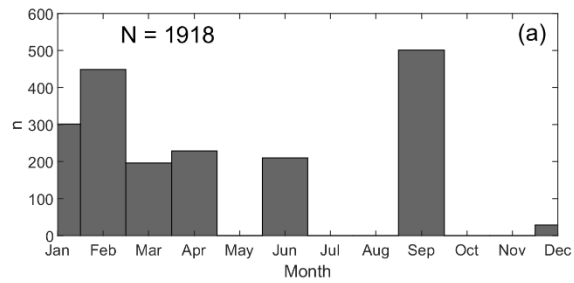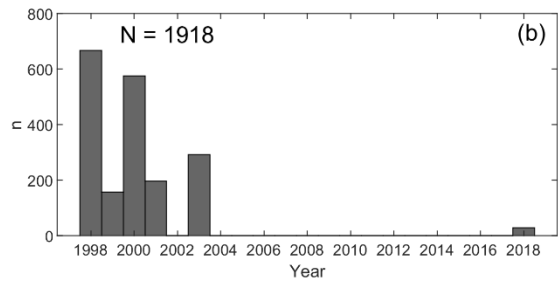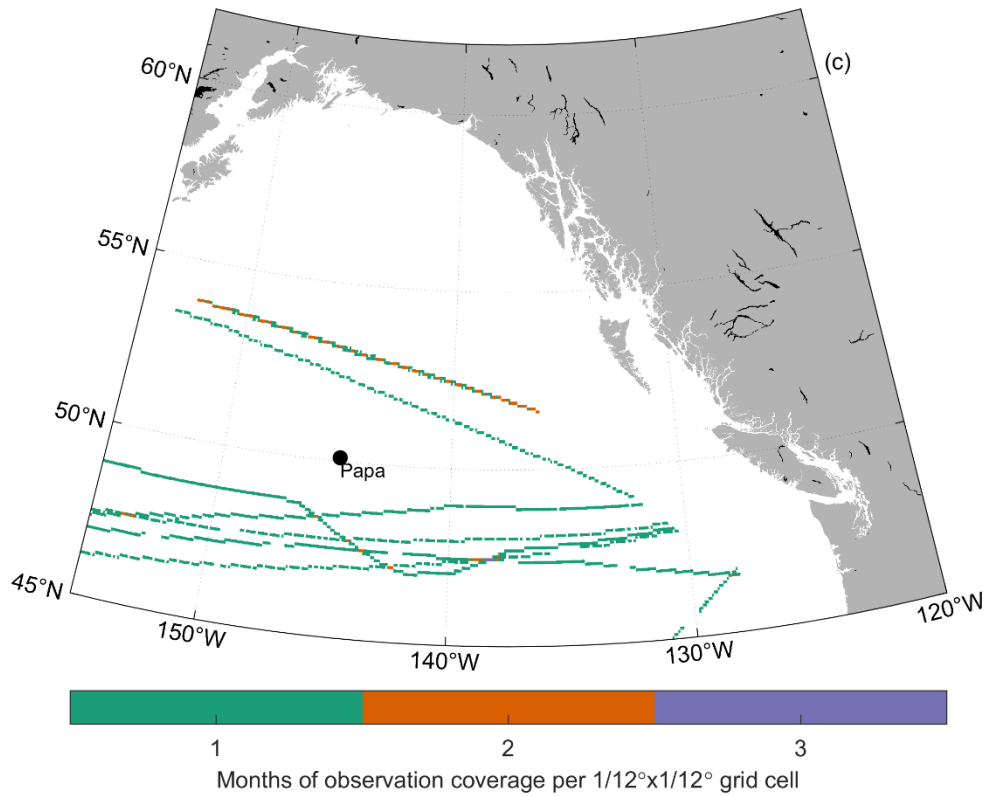

25 **Figure S1 Withheld data distribution in (a) month, (b) years, (c) geographically as the number of months of observational coverage per 1/12°x1/12° grid cell. Ocean Station Papa is shown for reference.**

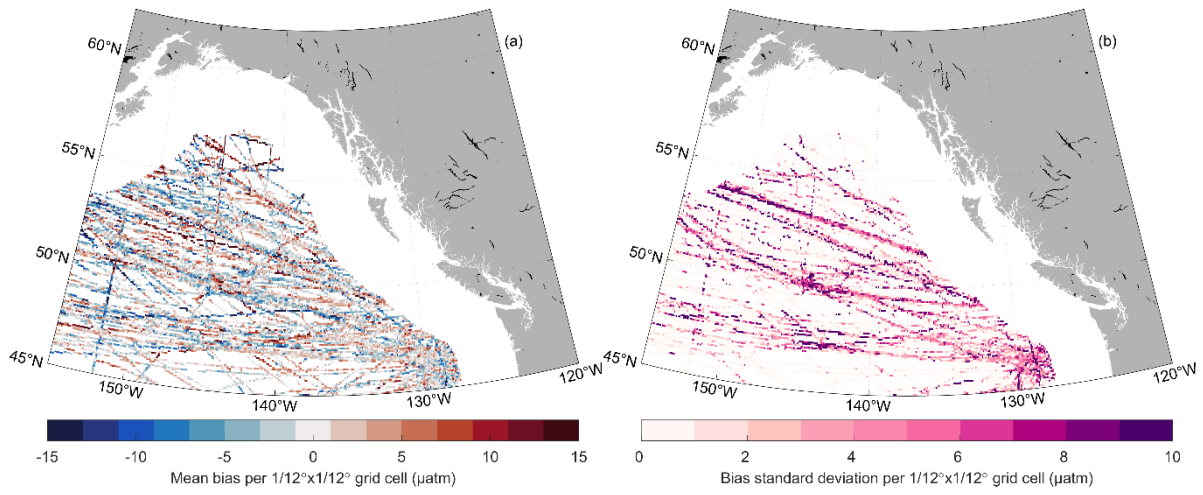

**Figure S2 Mapped mean bias and standard deviation in residuals between ANN-NEP  $\text{pCO}_2$  estimate and  $1/12^\circ \times 1/12^\circ$  gridded SOCAT data.**

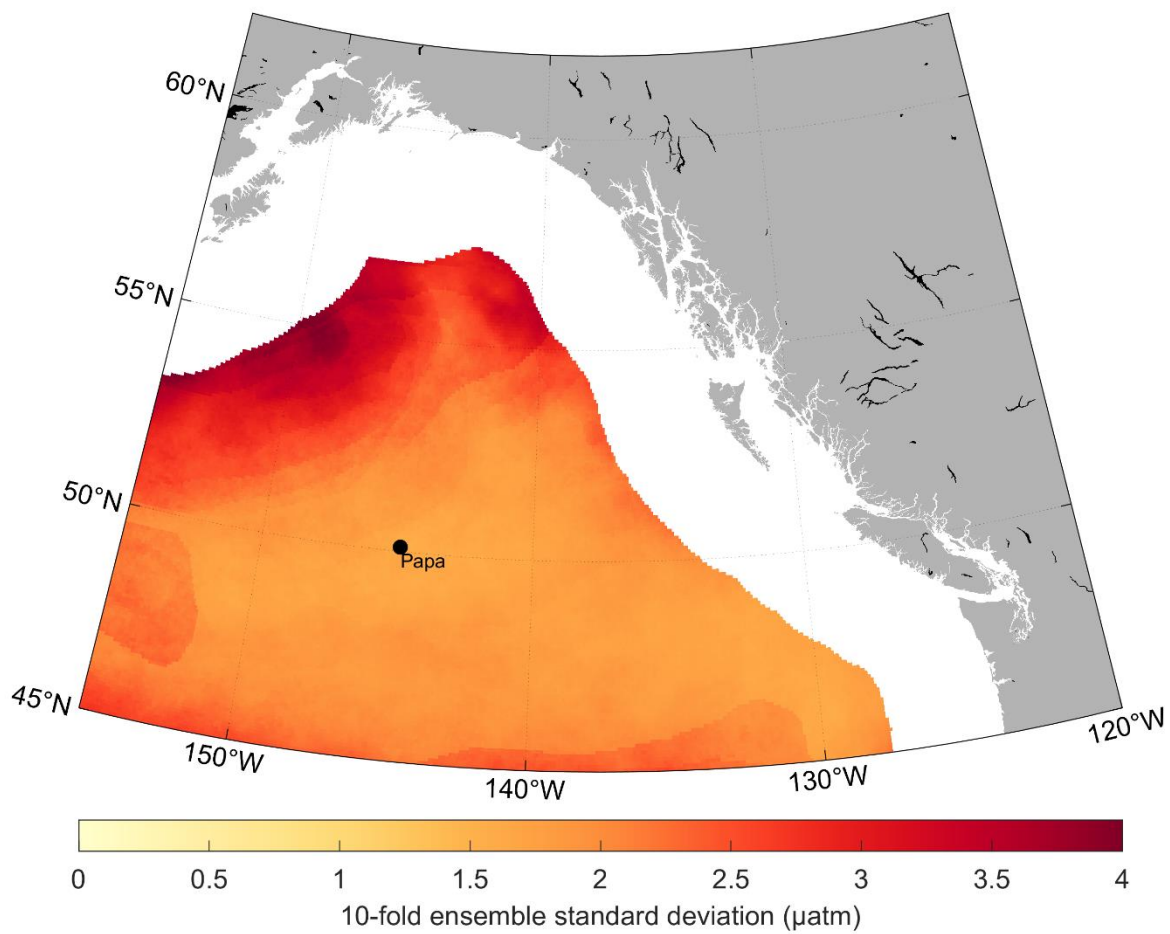

30 **Figure S3 Mean pCO<sub>2</sub> standard deviation between ANN-NEP 10-fold ensemble members. Ocean Station Papa is shown for reference.**

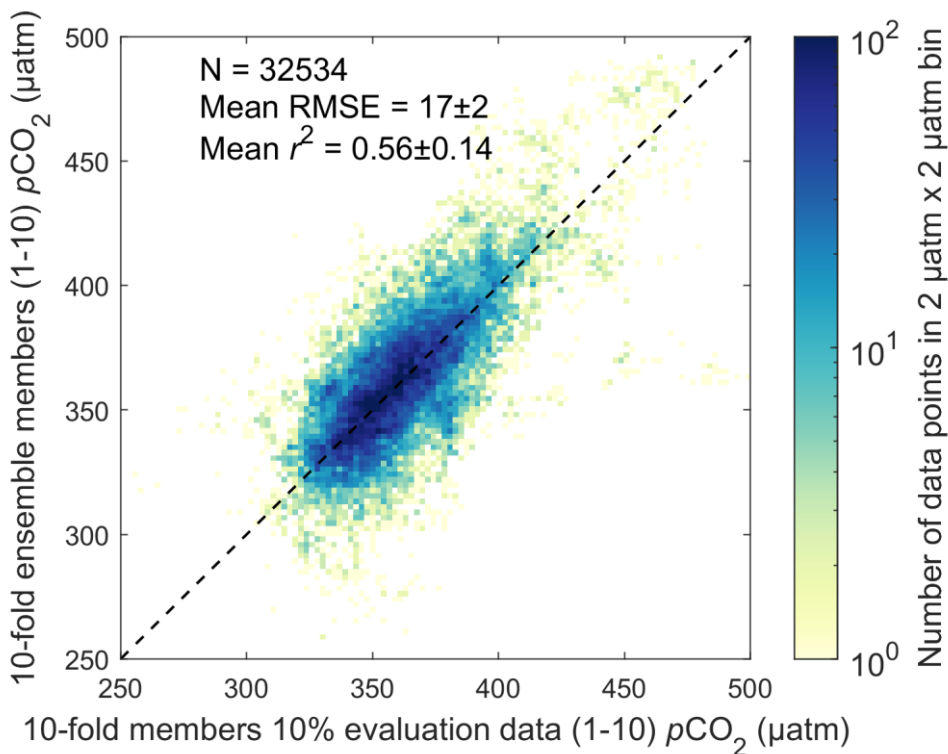

35 **Figure S4** 10-fold cross-evaluation (Section 2.4) individual ensemble member estimated  $p\text{CO}_2$  against the 10% 10-fold evaluation data specific to that ensemble member. Mean root mean squared error (RMSE) and coefficient of determination ( $r^2$ ) are across all individual ensemble members compared to the 10% evaluation data specific to that ensemble member. Data is binned into  $2 \mu\text{atm}$  by  $2 \mu\text{atm}$  bins. The dashed black line represents a perfect fit of slope ( $c_1$ ) = 1 and intercept = 0.

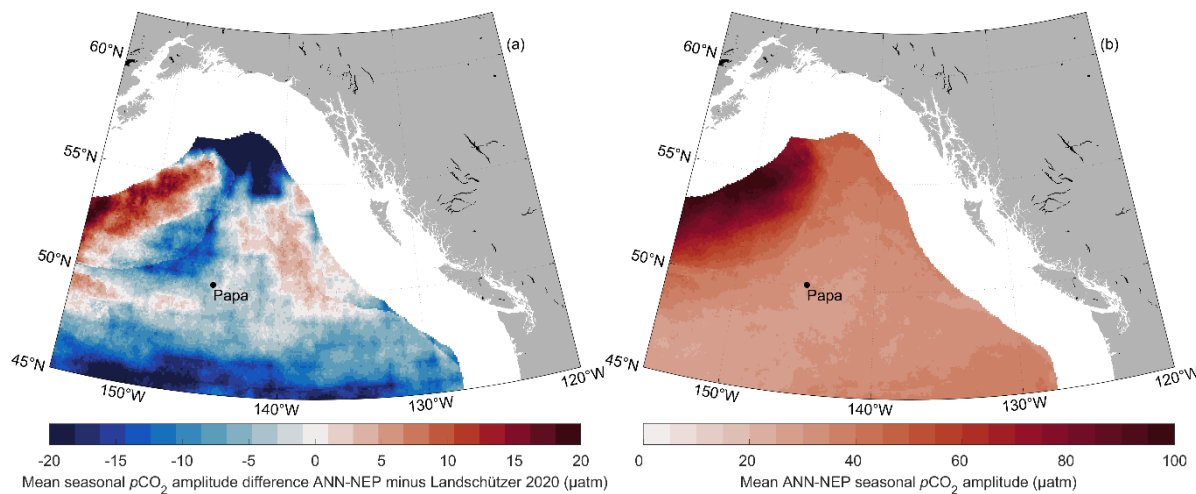

40 **Figure S5** (a) Mean difference in the surface ocean  $p\text{CO}_2$  seasonal amplitude in  $\mu\text{atm}$  between the ANN-NEP estimate (this study) and the Landschützer et al. (2020) global product. Positive (negative) differences indicate higher  $p\text{CO}_2$  seasonal amplitude for the ANN-NEP (Landschützer et al. (2020)) estimate. The Landschützer et al. (2020) estimates have been interpolated to the

1/12°x1/12° grid of this study. (b) Mean ANN-NEP seasonal surface ocean pCO<sub>2</sub> seasonal amplitude in  $\mu\text{atm}$ . Ocean Station Papa is shown for reference.

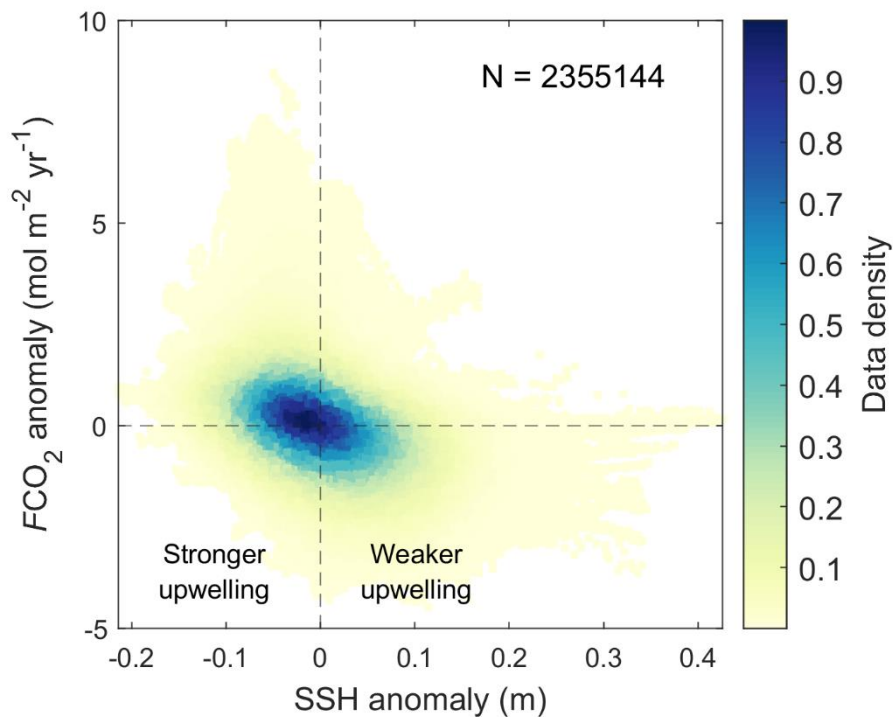

45 **Figure S6** Property to property plot of air-sea CO<sub>2</sub> flux density anomalies and sea surface height (SSH) anomalies (grid cell by grid cell) in the subpolar Alaskan Gyre region of our study area (latitudes north of 52° N). Stronger (weaker) upwelling label relates to gyre upwelling strength driven by winds enhancing (damping) Ekman pumping and depressing (elevating) SSH.

**Table S1 Regional high-resolution artificial neural network Northeast Pacific (ANN-NEP) pCO<sub>2</sub> product performance against all SOCAT pCO<sub>2</sub> observation data grouped by year and month. Number of observations (N), root mean squared error (RMSE), coefficient of determination ( $r^2$ ), and mean bias (calculated as the mean residual).**

|              | <b>N</b> | <b>RMSE</b> | <b><math>r^2</math></b> | <b>Mean bias</b> |
|--------------|----------|-------------|-------------------------|------------------|
| <i>Year</i>  |          |             |                         |                  |
| 1998         | 3085     | 8.1         | 0.73                    | -1.4             |
| 1999         | 2184     | 7.5         | 0.91                    | 1.4              |
| 2000         | 5195     | 8.1         | 0.93                    | 0.0              |
| 2001         | 2404     | 5.7         | 0.96                    | 1.2              |
| 2002         | 2110     | 7.1         | 0.91                    | 1.0              |
| 2003         | 2526     | 5.2         | 0.84                    | -1.3             |
| 2004         | 652      | 4.5         | 0.94                    | 1.2              |
| 2005         | 110      | 6.8         | 0.69                    | -3.6             |
| 2006         | 413      | 3.3         | 0.93                    | -2.6             |
| 2007         | 405      | 6.4         | 0.87                    | -2.8             |
| 2008         | 217      | 4.0         | 0.95                    | -1.3             |
| 2009         | 2751     | 5.0         | 0.94                    | -0.4             |
| 2010         | 1267     | 6.5         | 0.96                    | 1.9              |
| 2011         | 980      | 9.1         | 0.87                    | -1.0             |
| 2012         | 1567     | 6.1         | 0.93                    | 1.3              |
| 2013         | 1593     | 4.3         | 0.99                    | 0.9              |
| 2014         | 1017     | 5.1         | 0.95                    | -1.5             |
| 2015         | 836      | 9.1         | 0.95                    | 1.5              |
| 2016         | 919      | 6.3         | 0.91                    | -0.4             |
| 2017         | 511      | 4.7         | 0.89                    | 1.0              |
| 2018         | 1303     | 5.7         | 0.94                    | 1.2              |
| 2019         | 2051     | 8.1         | 0.93                    | -0.6             |
| <i>Month</i> |          |             |                         |                  |
| January      | 2731     | 5.2         | 0.97                    | 0.7              |
| February     | 2971     | 5.8         | 0.98                    | -0.7             |

|           |      |     |      |      |
|-----------|------|-----|------|------|
| March     | 1816 | 6.8 | 0.96 | -1.0 |
| April     | 2277 | 4.3 | 0.97 | 0.3  |
| May       | 3041 | 5.6 | 0.94 | 0.1  |
| June      | 4077 | 9.0 | 0.92 | -1.1 |
| July      | 3601 | 9.6 | 0.86 | -0.1 |
| August    | 3922 | 7.5 | 0.94 | 1.0  |
| September | 4121 | 6.6 | 0.93 | 0.2  |
| October   | 2240 | 4.9 | 0.91 | 1.2  |
| November  | 1511 | 3.9 | 0.97 | -0.4 |
| December  | 1788 | 4.4 | 0.97 | 0.8  |

50



55 Table S2 Regional artificial neural network Northeast Pacific pCO<sub>2</sub> product performance at varying resolutions against training and independent withheld SOCAT pCO<sub>2</sub> observations. Mean and standard deviation between lower 10<sup>th</sup> percentile (5 of 50 runs) of overfitting metric values for each resolution with varying internal data division ratios between the pCO<sub>2</sub> training data used by the ANN to train and internally evaluate. Number of observations (N), root mean squared error (RMSE), coefficient of determination (r<sup>2</sup>), mean absolute error (MAE), mean bias (calculated as the mean residual), and the slope of the linear regression (c<sub>1</sub>). Courser resolution product uncertainties are also included where overall pCO<sub>2</sub> product uncertainty ( $\theta_{pCO_2}$ ) is calculated from the square root of the sum of the three squared errors: observational uncertainty ( $\theta_{obs}$ ), gridding uncertainty ( $\theta_{grid}$ ), and ANN interpolation uncertainty ( $\theta_{map}$ ). The 10-fold ensemble approach was not run for the courser resolution products, likely leading to a slight underestimate of overall uncertainty as ANN run randomness uncertainty ( $\theta_{run}$ ) was excluded.

60

| <i>Training data</i>                       |                |                 |                      |                  |                      |            |
|--------------------------------------------|----------------|-----------------|----------------------|------------------|----------------------|------------|
| <b>Resolution</b>                          | <b>N</b>       | <b>RMSE</b>     | <b>r<sup>2</sup></b> | <b>Mean Bias</b> | <b>c<sub>1</sub></b> | <b>MAE</b> |
| 1°                                         | 2547           | 11.8±0.6        | 0.79±0.02            | -0.1±0.1         | 0.73±0.02            | 8.8±0.5    |
| 1/2°                                       | 5569           | 10.9±0.7        | 0.83±0.02            | 0.1±0.2          | 0.77±0.02            | 7.9±0.6    |
| 1/4°                                       | 11253          | 11.3±0.9        | 0.82±0.03            | 0.0±0.1          | 0.77±0.03            | 8.2±0.7    |
| 1/8°                                       | 21869          | 12.2±1.0        | 0.79±0.03            | 0.0±0.2          | 0.74±0.03            | 8.8±0.8    |
| 1/12°                                      | 31392          | 10.5±1.0        | 0.84±0.03            | 0.0±0.2          | 0.79±0.03            | 7.4±0.8    |
| <i>Independent withheld data</i>           |                |                 |                      |                  |                      |            |
| 1°                                         | 155            | 11.7±0.3        | 0.76±0.01            | -0.7±0.5         | 0.88±0.01            | 8.4±0.1    |
| 1/2°                                       | 350            | 11.5±0.6        | 0.78±0.02            | 0.1±0.7          | 0.93±0.03            | 8.3±0.5    |
| 1/4°                                       | 716            | 11.5±0.8        | 0.79±0.03            | 0.1±0.6          | 0.98±0.02            | 8.6±0.7    |
| 1/8°                                       | 1387           | 12.5±0.6        | 0.76±0.01            | -0.1±1.2         | 0.93±0.04            | 9.2±0.5    |
| 1/12°                                      | 1857           | 11.4±0.5        | 0.79±0.01            | 2.1±0.6          | 0.92±0.03            | 8.4±0.5    |
| <i>pCO<sub>2</sub> product uncertainty</i> |                |                 |                      |                  |                      |            |
|                                            | $\theta_{obs}$ | $\theta_{grid}$ | $\theta_{map}$       | $\theta_{pCO_2}$ |                      |            |
| 1°                                         | 3.1            | 3.7             | 11.7                 | 12.6             |                      |            |
| 1/2°                                       | 3.1            | 2.8             | 11.5                 | 12.3             |                      |            |
| 1/4°                                       | 3.1            | 2.0             | 11.5                 | 12.2             |                      |            |
| 1/8°                                       | 3.1            | 2.0             | 12.5                 | 13.0             |                      |            |
